# Supplementary material for: Exposing the intermolecular nature of the second relaxation pathway in a mononuclear cobalt(ii) single-molecule magnet with positive anisotropy
Source: Royal Society of Chemistry journal article supplement (doi:10.1039/c5dt00258c), 2015-01-01
Supplement: c5dt00258c1.pdf [file c5dt00258c1.pdf]

## Supplementary Information

### Exposing the Intermolecular Nature of the Second Relaxation Pathway in a Mononuclear Cobalt(II) Single-Molecule Magnet with Positive Anisotropy.

Fatemah Habib, Ilia Korobkov and Muralee Murugesu\*

*Department of Chemistry, University of Ottawa, 10 Marie Curie, Ottawa, ON, Canada K1N 6N5.*

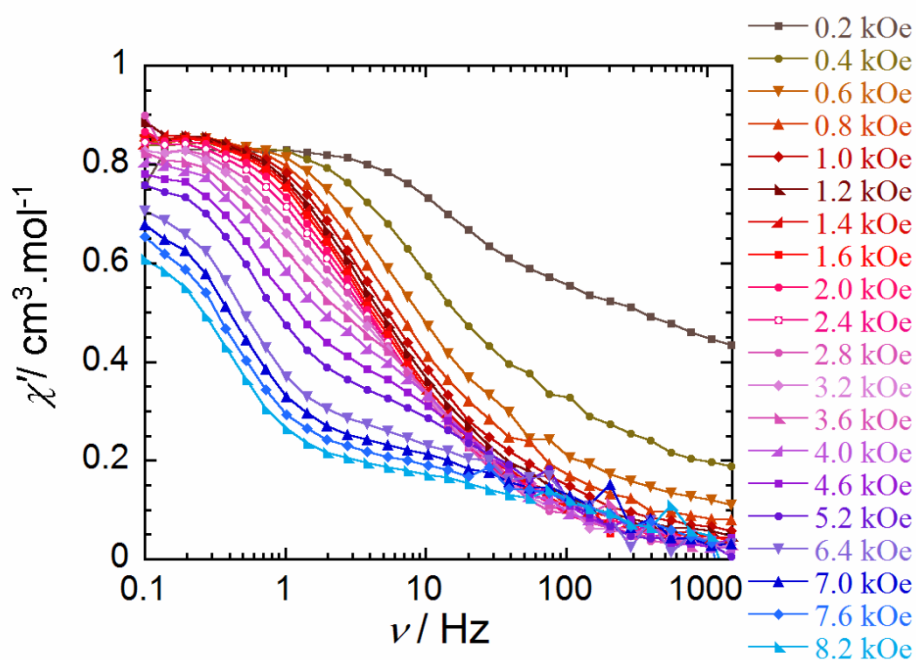

**Figure S1.** Frequency ( $\nu$ ) dependence of the in-phase magnetic susceptibility,  $\chi'$ , at applied dc fields ranging from 0.2 – 8.2 kOe at a temperature of 2 K for **1**.

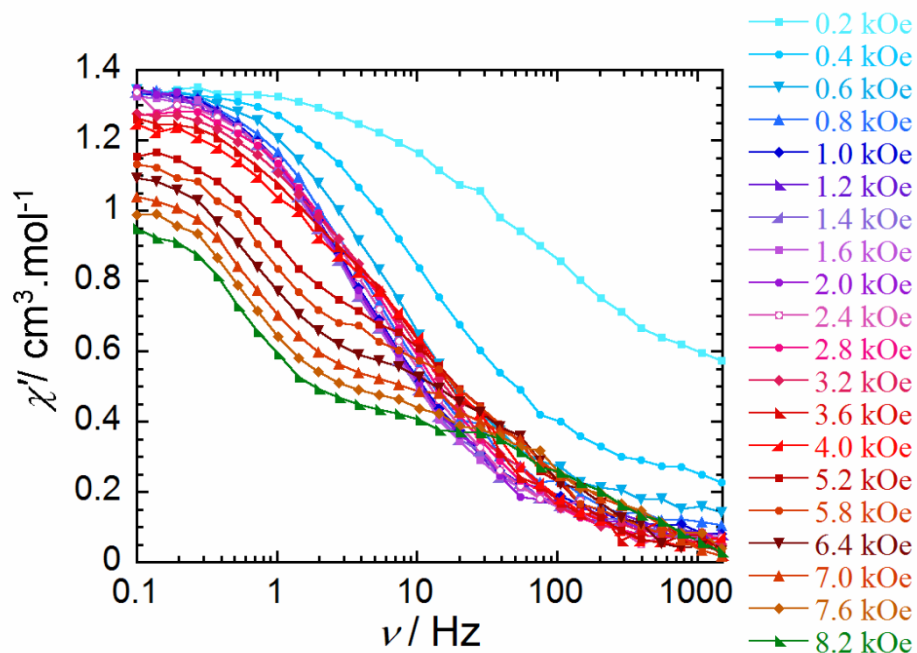

**Figure S2.** Frequency ( $\nu$ ) dependence of the in-phase magnetic susceptibility,  $\chi'$ , at applied dc fields ranging from 0.2 – 8.2 kOe at a temperature of 2 K for the 25% Co(II) sample

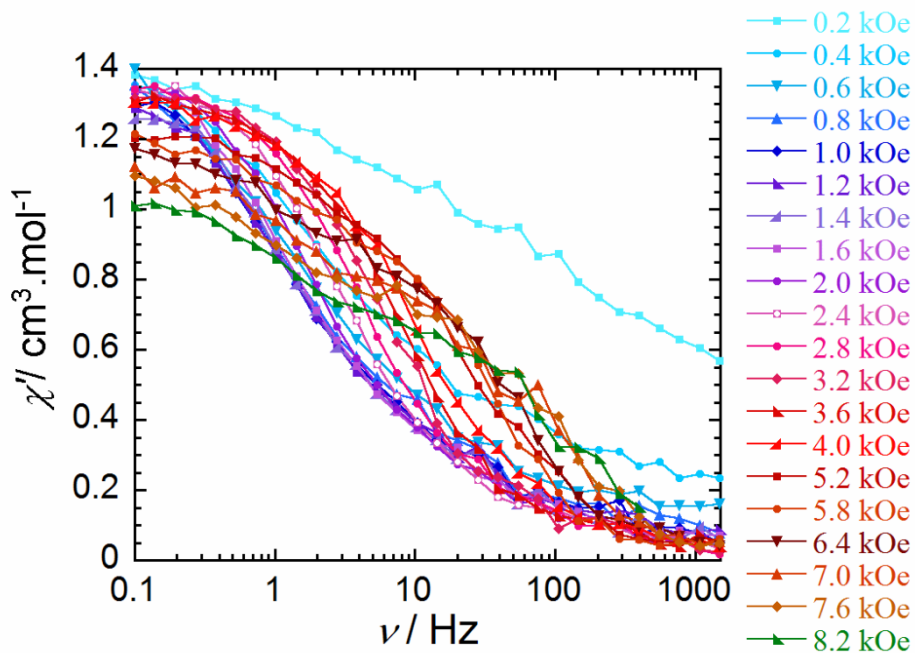

**Figure S3.** Frequency ( $\nu$ ) dependence of the in-phase magnetic susceptibility,  $\chi'$ , at applied dc fields ranging from 0.2 – 8.2 kOe at a temperature of 2 K for the 10% Co(II) sample

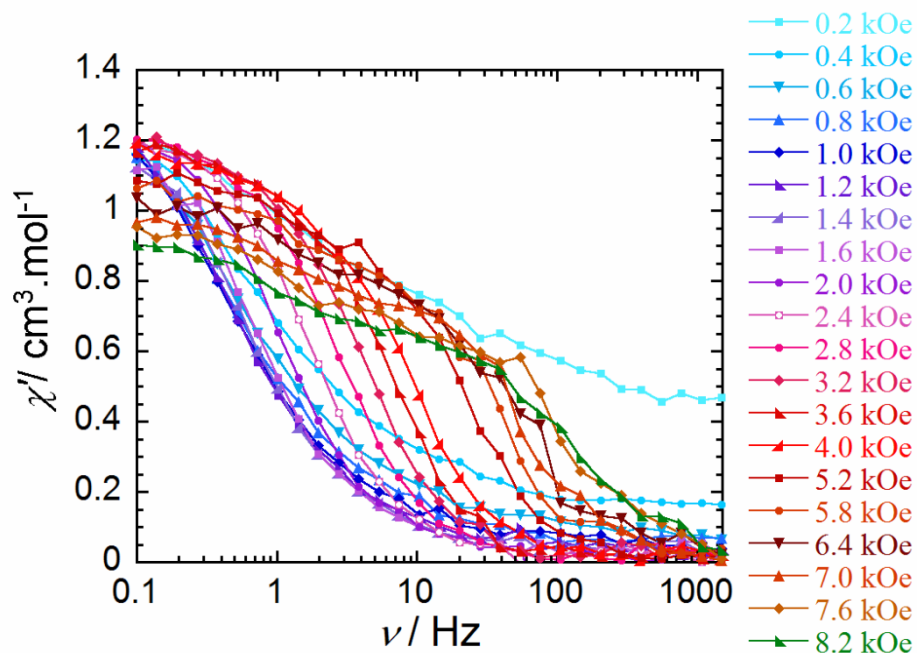

**Figure S4.** Frequency ( $\nu$ ) dependence of the in-phase magnetic susceptibility,  $\chi'$ , at applied dc fields ranging from 0.2 – 8.2 kOe at a temperature of 2 K for the 5% Co(II) sample.

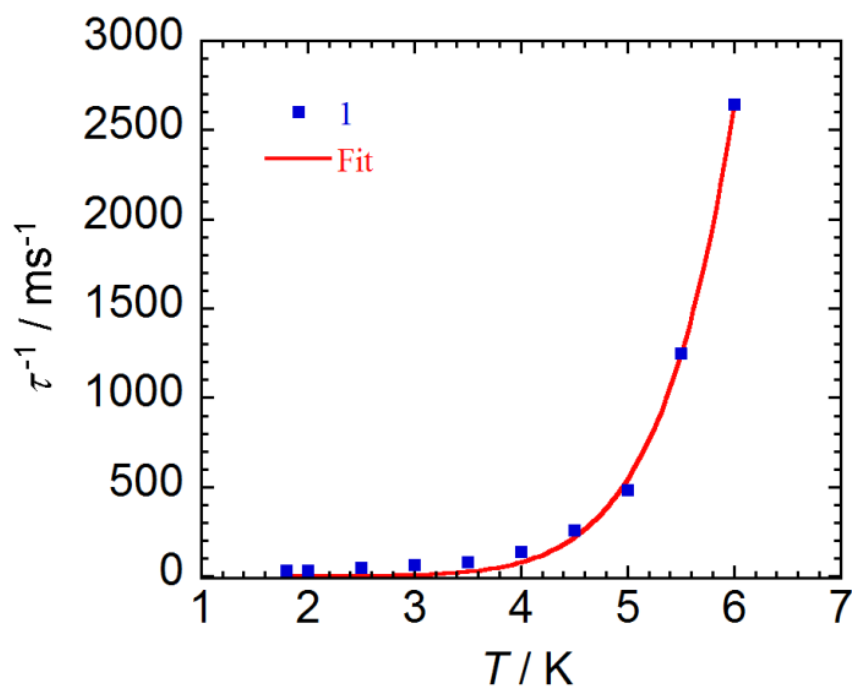

**Figure S5.** Plot of the inverse relaxation time *versus*  $T$  for complex **1**. Solid red line represents the fit to a Raman relaxation process,  $\tau^{-1} = CT^n$ . Best fit parameters yielded  $C = 4.66 \times 10^{-4}$  and  $n = 8.6$ .
